# Supplementary material for: Revised predictive equations for salt intrusion modelling in estuaries
Source: Copernicus journal article supplement (doi:10.5194/hess-19-2791-2015), 2015-06-18
Supplement: Supplementary file 1 [file hess-19-2791-2015-supplement.pdf]

Supplement of Hydrol. Earth Syst. Sci., 19, 2791–2803, 2015  
<http://www.hydrol-earth-syst-sci.net/19/2791/2015/>  
doi:10.5194/hess-19-2791-2015-supplement  
© Author(s) 2015. CC Attribution 3.0 License.

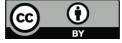

*Supplement of*

## **Revised predictive equations for salt intrusion modelling in estuaries**

**J. I. A. Gisen et al.**

*Correspondence to:* J. I. A. Gisen ([j.isabellaanakgisen@tudeft.nl](mailto:j.isabellaanakgisen@tudeft.nl), [isabella@ump.edu.my](mailto:isabella@ump.edu.my))

The copyright of individual parts of the supplement might differ from the CC-BY 3.0 licence.

Supplement of

## Revised predictive equations for salt intrusion modelling in estuaries

J. I. A. Gisen et al.

Correspondence to: J. I. A. Gisen ([j.isabellaanakgisen@tudelft.nl](mailto:j.isabellaanakgisen@tudelft.nl))

### Section SI (Table)

**Table S1.** Equations obtained from multiple regressions analysis.

| Equations for multiple regression analysis                                                   |      |                                                                                                                                                                  |       |
|----------------------------------------------------------------------------------------------|------|------------------------------------------------------------------------------------------------------------------------------------------------------------------|-------|
| $\frac{D_1^{TA}}{\nu_1 E_1} = 2141 N_r^{0.84} \left( \frac{h_1}{a_2} \right)$                | (R1) | $\frac{D_1^{TA}}{\nu_1 E_1} = 0.2942 N_r^{0.56} \left( \frac{a_2}{h_1} \right)^{0.04} \left( \frac{g}{C^2} \right)^{0.23}$                                       | (R10) |
| $\frac{D_1^{TA}}{\nu_1 E_1} = 0.1167 N_r^{0.57}$                                             | (R2) | $\frac{D_1^{TA}}{\nu_1 E_1} = 0.2347 N_r^{0.57} \left( \frac{g}{C^2} \right)^{0.23} \left( \frac{E_1}{H_1} \right)^{0.08}$                                       | (R11) |
| $\frac{D_1^{TA}}{\nu_1 E_1} = 0.1515 N_r^{0.58} \left( \frac{h_1}{a_2} \right)^{0.03}$       | (R3) | $\frac{D_1^{TA}}{\nu_1 E_1} = 0.4225 N_r^{0.57} \left( \frac{g}{C^2} \right)^{0.22} \left( \frac{a_2}{\lambda_1} \right)^{0.02}$                                 | (R12) |
| $\frac{D_1^{TA}}{\nu_1 E_1} = 0.3958 N_r^{0.57} \left( \frac{g}{C^2} \right)^{0.21}$         | (R4) | $\frac{D_1^{TA}}{\nu_1 E_1} = 0.3873 N_r^{0.57} \left( \frac{g}{C^2} \right)^{0.21} \left( \frac{\lambda_1}{E_1} \right)^{0.01}$                                 | (R13) |
| $\frac{D_1^{TA}}{\nu_1 E_1} = 0.2812 N_r^{0.57} \left( \frac{H_1}{E_1} \right)^{0.10}$       | (R5) | $\frac{D_1^{TA}}{\nu_1 E_1} = 49.83 \left( N_r \cdot \frac{g}{C^2} \cdot \frac{H_1}{E_1} \right)^{0.44}$                                                         | (R14) |
| $\frac{D_1^{TA}}{\nu_1 E_1} = 0.1344 N_r^{0.57} \left( \frac{h_1}{E_1} \right)^{0.02}$       | (R6) | $\frac{D_1^{TA}}{\nu_1 E_1} = 0.2708 \left( N_r \cdot \frac{g}{C^2} \cdot \frac{\lambda_1}{E_1} \right)^{0.45}$                                                  | (R15) |
| $\frac{D_1^{TA}}{\nu_1 E_1} = 0.1243 N_r^{0.58} \left( \frac{E_1}{\lambda_1} \right)^{0.02}$ | (R7) | $\frac{D_1^{TA}}{\nu_1 E_1} = 0.2338 N_r^{0.56} \left( \frac{a_2}{h_1} \right)^{0.03} \left( \frac{g}{C^2} \right)^{0.24} \left( \frac{E_1}{H_1} \right)^{0.05}$ | (R16) |
| $\frac{D_1^{TA}}{\nu_1 E_1} = 0.1138 N_r^{0.58} \left( \frac{\lambda_1}{a_2} \right)^{0.02}$ | (R8) | $\frac{D_1^{TA}}{\nu_1 E_1} = 0.0514 \left( \frac{g}{C^2} \right)^{0.29} \left( \frac{E_1}{H_1} \right)^{0.12}$                                                  | (R17) |
| $\frac{D_1^{TA}}{\nu_1 E_1} = 1.9474 \left( N_r \cdot \frac{g}{C^2} \right)^{0.51}$          | (R9) | $\frac{D_1^{TA}}{\nu_1 E_1} = 0.5746 \left( \frac{g}{C^2} \right)^{0.31} \left( \frac{h_1}{B_1} \right)^{0.27}$                                                  | (R18) |

**Table S2.** Data used to develop the predictive equation for the dispersion coefficient  $D$ .

| <b>(a) Reliable sets for calibration</b> |                |          |                            |              |              |               |           |                          |       |                                                   |                              |              |              |              |
|------------------------------------------|----------------|----------|----------------------------|--------------|--------------|---------------|-----------|--------------------------|-------|---------------------------------------------------|------------------------------|--------------|--------------|--------------|
| No                                       | Estuary        | Date     | $A_1$<br>(m <sup>2</sup> ) | $h_1$<br>(m) | $H_0$<br>(m) | $E_0$<br>(km) | T<br>(hr) | Q<br>(m <sup>3</sup> /s) | $K_m$ | $\delta_H$<br>(10 <sup>-6</sup> m <sup>-1</sup> ) | $D_1$<br>(m <sup>2</sup> /s) | $D_1$<br>[2] | $D_1$<br>[4] | $D_1$<br>[9] |
| 1a                                       | Kurau          | 27/02/13 | 660                        | 5.2          | 2.0          | 9.4           | 12        | 50                       | 30    | -6.3                                              | 443                          | 514          | 572          | 443          |
| 1b                                       |                | 28/02/13 | 660                        | 5.2          | 2.0          | 9.4           | 12        | 50                       | 30    | -6.3                                              | 456                          | 529          | 587          | 456          |
| 2                                        | Perak          | 13/03/13 | 9210                       | 4.5          | 2.5          | 12.5          | 12        | 316                      | 65    | 3.0                                               | 235                          | 199          | 159          | 235          |
| 3                                        | Bernam         | 21/06/12 | 4460                       | 3.5          | 2.9          | 14.0          | 12        | 42                       | 70    | 1.7                                               | 169                          | 141          | 116          | 169          |
| 4                                        | Selangor       | 24/07/12 | 1000                       | 3.6          | 4.0          | 12.7          | 12        | 41                       | 40    | -3.7                                              | 326                          | 349          | 381          | 326          |
| 5                                        | Muar           | 03/08/12 | 1580                       | 5.6          | 2.0          | 11.0          | 12        | 35                       | 45    | -2.7                                              | 283                          | 273          | 252          | 283          |
| 6                                        | Endau          | 28/03/13 | 2000                       | 6.5          | 1.9          | 10.0          | 12        | 54                       | 45    | -1.3                                              | 329                          | 321          | 293          | 329          |
| 7                                        | Maputo         | 28/04/82 | 4700                       | 4.1          | 2.8          | 13.0          | 12        | 25                       | 58    | 2.0                                               | 139                          | 127          | 122          | 139          |
| 7a                                       |                | 15/07/82 | 4700                       | 4.1          | 1.5          | 7.0           | 12        | 8                        | 58    | 2.0                                               | 64                           | 59           | 53           | 64           |
| 7b                                       |                | 19/04/84 | 4700                       | 4.1          | 3.3          | 13.0          | 12        | 120                      | 58    | 2.0                                               | 293                          | 267          | 236          | 293          |
| 7c                                       |                | 17/05/84 | 4700                       | 4.1          | 3.3          | 13.0          | 12        | 50                       | 58    | 2.0                                               | 187                          | 170          | 158          | 187          |
| 7d                                       |                | 29/05/84 | 4700                       | 4.1          | 2.8          | 13.0          | 12        | 40                       | 58    | 2.0                                               | 171                          | 156          | 146          | 171          |
| 8                                        | Thames (New)   | 07/04/49 | 10900                      | 13.9         | 5.3          | 14.0          | 12        | 40                       | 45    | 1.1                                               | 209                          | 202          | 206          | 209          |
| 9                                        | Corantijn      | 09/12/78 | 26800                      | 5.4          | 1.8          | 10.0          | 12        | 120                      | 40    | -1.7                                              | 91                           | 94           | 104          | 91           |
| 9a                                       |                | 14/12/78 | 26800                      | 5.4          | 2.3          | 13.0          | 12        | 130                      | 40    | -1.7                                              | 91                           | 94           | 111          | 91           |
| 9b                                       |                | 20/12/78 | 26800                      | 5.4          | 1.6          | 9.0           | 12        | 220                      | 40    | -1.7                                              | 105                          | 109          | 117          | 105          |
| 10                                       | Sinnamary      | 12/11/93 | 1120                       | 2.4          | 2.6          | 8.6           | 12        | 168                      | 40    | -5.0                                              | 293                          | 312          | 315          | 293          |
| 10a                                      |                | 27/04/94 | 1120                       | 2.4          | 2.9          | 9.6           | 12        | 148                      | 40    | -5.0                                              | 302                          | 321          | 331          | 302          |
| 10b                                      |                | 02/11/94 | 1120                       | 2.4          | 2.7          | 7.8           | 12        | 112                      | 40    | -5.0                                              | 385                          | 408          | 392          | 385          |
| 10c                                      |                | 03/11/94 | 1120                       | 2.4          | 2.9          | 9.5           | 12        | 112                      | 40    | -5.0                                              | 341                          | 363          | 368          | 341          |
| 11                                       | MaeKlong       | 08/03/77 | 1100                       | 4.6          | 1.5          | 10.0          | 12        | 60                       | 40    | -4.2                                              | 466                          | 490          | 478          | 466          |
| 11a                                      |                | 09/04/77 | 1100                       | 4.6          | 2.0          | 9.0           | 12        | 36                       | 40    | -4.2                                              | 347                          | 365          | 359          | 347          |
| 12                                       | Lalang         | 20/10/89 | 2880                       | 8.0          | 2.6          | 29.0          | 24        | 120                      | 84    | -0.5                                              | 762                          | 557          | 358          | 762          |
| 13                                       | Limpopo        | 04/04/80 | 1140                       | 6.3          | 1.1          | 7.0           | 12        | 150                      | 43    | 1.7                                               | 140                          | 140          | 135          | 140          |
| 13a                                      |                | 31/12/82 | 1140                       | 6.3          | 1.1          | 8.0           | 12        | 2                        | 43    | 1.7                                               | 70                           | 71           | 76           | 70           |
| 13b                                      |                | 14/07/94 | 1140                       | 6.3          | 1.0          | 7.0           | 12        | 5                        | 43    | 1.7                                               | 91                           | 92           | 92           | 91           |
| 13c                                      |                | 24/07/94 | 1140                       | 6.3          | 0.9          | 6.8           | 12        | 5                        | 43    | 1.7                                               | 101                          | 102          | 101          | 101          |
| 13d                                      |                | 10/08/94 | 1140                       | 6.3          | 1.0          | 7.1           | 12        | 3                        | 43    | 1.7                                               | 81                           | 82           | 84           | 81           |
| 14                                       | Tha Chin (New) | 16/04/81 | 1440                       | 5.6          | 1.6          | 12.0          | 24        | 55                       | 50    | -5.5                                              | 653                          | 615          | 479          | 653          |
| 14a                                      |                | 27/02/86 | 1440                       | 5.6          | 2.6          | 20.0          | 12        | 40                       | 50    | -10.6                                             | 410                          | 390          | 380          | 410          |
| 14b                                      |                | 01/03/86 | 1440                       | 5.6          | 1.8          | 14.0          | 24        | 40                       | 50    | -5.5                                              | 648                          | 611          | 492          | 648          |
| 14c                                      |                | 13/08/87 | 1440                       | 5.6          | 2.0          | 15.0          | 12        | 39                       | 50    | -10.6                                             | 320                          | 303          | 286          | 320          |
| 15                                       | ChaoPhya       | 05/06/62 | 3100                       | 6.5          | 2.2          | 22.0          | 24        | 63                       | 65    | -2.2                                              | 509                          | 428          | 328          | 509          |
| 15a                                      |                | 16/01/87 | 3100                       | 6.5          | 2.5          | 14.0          | 24        | 180                      | 65    | -2.2                                              | 389                          | 326          | 234          | 389          |
| 15b                                      |                | 23/02/83 | 3100                       | 6.5          | 1.6          | 19.0          | 24        | 100                      | 65    | -2.2                                              | 574                          | 481          | 353          | 574          |
| 15c                                      |                | 29/01/83 | 3100                       | 6.5          | 2.4          | 26.0          | 24        | 90                       | 65    | -2.2                                              | 681                          | 572          | 441          | 681          |
| 16                                       | Edisto         | 12/07/10 | 5150                       | 4.1          | 2.3          | 10.0          | 12        | 15                       | 30    | -8.8                                              | 120                          | 144          | 195          | 120          |
| 16a                                      |                | 13/07/10 | 5150                       | 4.1          | 2.3          | 10.0          | 12        | 14                       | 30    | -8.8                                              | 109                          | 131          | 180          | 109          |
| 16b                                      |                | 14/07/10 | 5150                       | 4.1          | 2.3          | 10.0          | 12        | 25                       | 30    | -8.8                                              | 156                          | 187          | 247          | 156          |
| 16c                                      |                | 15/07/10 | 5150                       | 4.1          | 2.3          | 10.0          | 12        | 25                       | 30    | -8.8                                              | 156                          | 187          | 246          | 156          |
| 17                                       | Elbe_Flanders  | 21/09/04 | 27300                      | 9.0          | 3.0          | 18.0          | 12        | 200                      | 32    | 2.0                                               | 168                          | 188          | 254          | 168          |
| 17a                                      | Elbe_Kuijper   | 21/09/04 | 46000                      | 10.2         | 3.0          | 18.0          | 12        | 200                      | 32    | 2.0                                               | 216                          | 238          | 303          | 216          |
| 17b                                      | Elbe_Savenije  | 21/09/04 | 43000                      | 9.3          | 3.0          | 18.0          | 12        | 200                      | 32    | 2.0                                               | 213                          | 233          | 292          | 213          |
| 18                                       | Pangani        | 27/10/07 | 860                        | 3.2          | 4.2          | 17.0          | 12        | 15                       | 42    | 10.0                                              | 254                          | 271          | 321          | 254          |
| 18a                                      |                | 11/12/07 | 860                        | 3.2          | 3.0          | 15.0          | 12        | 11                       | 42    | 10.0                                              | 203                          | 216          | 256          | 203          |
| 19                                       | Rembau Linggi  | 05/07/12 | 1500                       | 4.6          | 2.0          | 8.7           | 12        | 26                       | 30    | -14.0                                             | 253                          | 308          | 384          | 253          |
| 20                                       | Landak         | 15/09/09 | 2000                       | 8.7          | 1.6          | 15.0          | 24        | 10                       | 45    | -6.7                                              | 176                          | 169          | 163          | 176          |

Note:  $H_0$ ,  $E_0$ ,  $\delta_H$  and  $Q$  reflect the condition at the time of observation.

**(b) Less Reliable Sets for Verification**

| No  | Estuary          | Date     | A <sub>1</sub><br>(m <sup>2</sup> ) | h <sub>1</sub><br>(m) | H <sub>0</sub><br>(m) | E <sub>0</sub><br>(km) | T<br>(hr) | Q<br>(m <sup>3</sup> /s) | K <sub>m</sub> | δ <sub>H</sub><br>(10 <sup>-6</sup> m <sup>-1</sup> ) | D <sub>1</sub><br>(m <sup>2</sup> /s) | D <sub>1</sub><br>[2] | D <sub>1</sub><br>[4] | D <sub>1</sub><br>[9] |
|-----|------------------|----------|-------------------------------------|-----------------------|-----------------------|------------------------|-----------|--------------------------|----------------|-------------------------------------------------------|---------------------------------------|-----------------------|-----------------------|-----------------------|
| 21  | Delaware         | 23/08/32 | 255000                              | 6.8                   | 1.7                   | 8.0                    | 12        | 120                      | 55             | 0.7                                                   | 42                                    | 38                    | 37                    | 42                    |
| 21a |                  | 04/10/32 | 255000                              | 6.8                   | 1.7                   | 8.0                    | 12        | 72                       | 55             | 0.7                                                   | 31                                    | 28                    | 28                    | 31                    |
| 22  | Westerschelde    | 01/07/87 | 150000                              | 9.4                   | 3.0                   | 10.0                   | 12        | 90                       | 46             | 2.8                                                   | 61                                    | 58                    | 61                    | 61                    |
| 22a |                  | 02/11/00 | 150000                              | 9.4                   | 4.0                   | 12.0                   | 12        | 220                      | 46             | 2.8                                                   | 111                                   | 105                   | 107                   | 111                   |
| 23  | Pungue           | 26/05/82 | 14500                               | 2.8                   | 5.0                   | 9.0                    | 12        | 50                       | 31             | -8.5                                                  | 79                                    | 97                    | 137                   | 79                    |
| 23a |                  | 06/08/82 | 14500                               | 2.8                   | 5.2                   | 10.0                   | 12        | 36                       | 31             | -8.5                                                  | 71                                    | 86                    | 127                   | 71                    |
| 23b |                  | 22/09/82 | 14500                               | 2.8                   | 5.2                   | 15.0                   | 12        | 26                       | 31             | -8.5                                                  | 66                                    | 81                    | 131                   | 66                    |
| 23c |                  | 29/10/82 | 14500                               | 2.8                   | 6.0                   | 15.0                   | 12        | 60                       | 31             | -8.5                                                  | 105                                   | 129                   | 197                   | 105                   |
| 23d |                  | 31/01/02 | 14500                               | 2.8                   | 6.2                   | 19.0                   | 12        | 262                      | 31             | -8.5                                                  | 213                                   | 261                   | 389                   | 213                   |
| 23e |                  | 27/02/02 | 14500                               | 2.8                   | 6.1                   | 21.0                   | 12        | 200                      | 31             | -8.5                                                  | 191                                   | 234                   | 362                   | 191                   |
| 23f |                  | 01/03/02 | 14500                               | 2.8                   | 6.7                   | 27.0                   | 12        | 150                      | 31             | -8.5                                                  | 170                                   | 209                   | 345                   | 170                   |
| 23g |                  | 26/09/80 | 14500                               | 2.8                   | 6.3                   | 17.0                   | 12        | 22                       | 31             | -8.5                                                  | 62                                    | 76                    | 127                   | 62                    |
| 23h |                  | 03/10/93 | 14500                               | 2.8                   | 5.3                   | 11.0                   | 12        | 10                       | 31             | -8.5                                                  | 36                                    | 45                    | 72                    | 36                    |
| 23i |                  | 12/10/93 | 14500                               | 2.8                   | 3.8                   | 15.0                   | 12        | 10                       | 31             | -8.5                                                  | 40                                    | 49                    | 83                    | 40                    |
| 23j |                  | 16/10/93 | 14500                               | 2.8                   | 6.4                   | 16.0                   | 12        | 10                       | 31             | -8.5                                                  | 40                                    | 49                    | 85                    | 40                    |
| 24  | Incomati         | 05/09/82 | 1070                                | 2.8                   | 1.4                   | 7.0                    | 12        | 2                        | 56             | -19.9                                                 | 41                                    | 39                    | 37                    | 41                    |
| 24a |                  | 23/06/93 | 1070                                | 2.8                   | 1.4                   | 8.0                    | 12        | 4                        | 56             | -19.9                                                 | 53                                    | 50                    | 47                    | 53                    |
| 24b |                  | 07/07/93 | 1070                                | 2.8                   | 2.6                   | 9.0                    | 12        | 4                        | 56             | -19.9                                                 | 52                                    | 49                    | 48                    | 52                    |
| 25  | Solo             | 26/07/88 | 2070                                | 9.2                   | 0.8                   | 9.0                    | 24        | 50                       | 31             | 3.0                                                   | 727                                   | 805                   | 743                   | 727                   |
| 25a |                  | 08/09/88 | 2070                                | 9.2                   | 0.4                   | 5.0                    | 24        | 7                        | 31             | 3.0                                                   | 218                                   | 242                   | 224                   | 218                   |
| 26  | Eems             | -        | 120000                              | 3.8                   | 3.6                   | 15.0                   | 12        | 10                       | 31             | -0.7                                                  | 14                                    | 17                    | 31                    | 14                    |
| 27  | Tejo             | 18/08/81 | 100000                              | 5.0                   | 3.4                   | 10.0                   | 12        | 29                       | 56             | 2.2                                                   | 31                                    | 28                    | 30                    | 31                    |
| 27a |                  | 21/10/81 | 100000                              | 5.0                   | 1.9                   | 6.0                    | 12        | 149                      | 56             | 2.2                                                   | 68                                    | 62                    | 54                    | 68                    |
| 28  | Elbe_Flanders    | 09/07/02 | 27300                               | 9.0                   | 3.3                   | 10.0                   | 12        | 100                      | 32             | 2.0                                                   | 25                                    | 28                    | 41                    | 25                    |
| 28a |                  | 04/04/04 | 27300                               | 9.0                   | 3.7                   | 22.0                   | 12        | 211                      | 32             | 2.0                                                   | 51                                    | 57                    | 92                    | 51                    |
| 28b |                  | 01/11/04 | 27300                               | 9.0                   | 3.4                   | 10.0                   | 12        | 100                      | 32             | 2.0                                                   | 28                                    | 31                    | 45                    | 28                    |
| 29a | Elbe_Kuijper     | 09/07/02 | 46000                               | 10.2                  | 3.3                   | 10.0                   | 12        | 100                      | 32             | 2.0                                                   | 75                                    | 83                    | 104                   | 75                    |
| 29b |                  | 04/04/04 | 46000                               | 10.2                  | 3.7                   | 21.0                   | 12        | 211                      | 32             | 2.0                                                   | 167                                   | 185                   | 250                   | 167                   |
| 29c |                  | 01/11/04 | 46000                               | 10.2                  | 3.4                   | 10.0                   | 12        | 100                      | 32             | 2.0                                                   | 70                                    | 77                    | 97                    | 70                    |
| 30a | Elbe_Savenije    | 09/07/02 | 43000                               | 9.3                   | 3.3                   | 10.0                   | 12        | 100                      | 32             | 2.0                                                   | 75                                    | 81                    | 101                   | 75                    |
| 30b |                  | 04/04/04 | 43000                               | 9.3                   | 3.7                   | 21.0                   | 12        | 211                      | 32             | 2.0                                                   | 165                                   | 181                   | 242                   | 165                   |
| 30c |                  | 01/11/04 | 43000                               | 9.3                   | 3.4                   | 10.0                   | 12        | 100                      | 32             | 2.0                                                   | 69                                    | 75                    | 94                    | 69                    |
| 31a | Rompin           | 10/07/98 | 840                                 | 6.1                   | 1.7                   | 8.7                    | 12        | 20                       | 15             | -33.4                                                 | 107                                   | 167                   | 283                   | 107                   |
| 31b |                  | 11/07/98 | 840                                 | 6.1                   | 1.8                   | 8.7                    | 12        | 20                       | 15             | -33.4                                                 | 100                                   | 155                   | 265                   | 100                   |
| 31c |                  | 12/07/98 | 840                                 | 6.1                   | 1.9                   | 8.7                    | 12        | 20                       | 15             | -33.4                                                 | 96                                    | 150                   | 257                   | 96                    |
| 32a | Ulu Sedili Besar | 24/06/98 | 670                                 | 4.7                   | 1.1                   | 11.0                   | 12        | 8                        | 30             | -25.5                                                 | 160                                   | 192                   | 252                   | 160                   |
| 32b |                  | 25/06/98 | 670                                 | 4.7                   | 1.2                   | 11.0                   | 12        | 8                        | 30             | -25.5                                                 | 161                                   | 193                   | 253                   | 161                   |
| 32c |                  | 26/06/98 | 670                                 | 4.7                   | 1.3                   | 11.0                   | 12        | 8                        | 30             | -25.5                                                 | 170                                   | 204                   | 266                   | 170                   |

Note:  $H_0$ ,  $E_0$ ,  $\delta_H$  and  $Q$  reflect the condition at the time of observation.

**Table S3.** Data and results of the maximum salt intrusion length  $L^{HWS}$ 

| <b>(a) Reliable Sets for Calibration</b> |                |          |                    |               |              |               |                    |            |        |                   |                  |                  |                  |
|------------------------------------------|----------------|----------|--------------------|---------------|--------------|---------------|--------------------|------------|--------|-------------------|------------------|------------------|------------------|
| No                                       | Estuary        | Date     | $A_1$<br>( $m^2$ ) | $a_2$<br>(km) | $x_1$<br>(m) | $E_0$<br>(km) | $Q$<br>( $m^3/s$ ) | $K$<br>Pre | $N_r$  | $L^{HWS}$<br>(km) | $L^{HWS}$<br>[2] | $L^{HWS}$<br>[4] | $L^{HWS}$<br>[9] |
| 1a                                       | Kurau          | 27/02/13 | 660                | 46            | 3600         | 9.4           | 50                 | 0.35       | 0.4530 | 17                | 23               | 24               | 26               |
| 1b                                       |                | 28/02/13 | 660                | 46            | 3600         | 9.4           | 50                 | 0.35       | 0.4765 | 18                | 23               | 25               | 26               |
| 2                                        | Perak          | 13/03/13 | 9210               | 37            | 4000         | 12.5          | 316                | 0.24       | 0.0493 | 29                | 31               | 29               | 26               |
| 3                                        | Bernam         | 21/06/12 | 4460               | 25            | 4300         | 14.0          | 42                 | 0.22       | 0.0190 | 58                | 48               | 44               | 41               |
| 4                                        | Selangor       | 24/07/12 | 1000               | 13            | 2800         | 12.7          | 41                 | 0.42       | 0.0891 | 22                | 21               | 22               | 22               |
| 5                                        | Muar           | 03/08/12 | 1580               | 100           | 3900         | 11.0          | 35                 | 0.32       | 0.1150 | 51                | 43               | 42               | 40               |
| 6                                        | Endau          | 28/03/13 | 2000               | 44            | 4800         | 10.0          | 54                 | 0.33       | 0.2050 | 29                | 39               | 39               | 37               |
| 7                                        | Maputo         | 28/04/82 | 4700               | 16            | 5100         | 13.0          | 25                 | 0.32       | 0.0173 | 30                | 41               | 39               | 39               |
| 7a                                       |                | 15/07/82 | 4700               | 16            | 5100         | 7.0           | 8                  | 0.32       | 0.0389 | 36                | 43               | 41               | 40               |
| 7b                                       |                | 19/04/84 | 4700               | 16            | 5100         | 13.0          | 120                | 0.32       | 0.0635 | 27                | 30               | 29               | 28               |
| 7c                                       |                | 17/05/84 | 4700               | 16            | 5100         | 13.0          | 50                 | 0.32       | 0.0289 | 28                | 35               | 34               | 33               |
| 7d                                       |                | 29/05/84 | 4700               | 16            | 5100         | 13.0          | 40                 | 0.32       | 0.0248 | 32                | 37               | 36               | 35               |
| 8                                        | Thames (New)   | 07/04/49 | 10900              | 23            | 31000        | 14.0          | 40                 | 0.24       | 0.0250 | 100               | 94               | 93               | 93               |
| 9                                        | Corantijn      | 09/12/78 | 26800              | 64            | 18000        | 10.0          | 120                | 0.27       | 0.0237 | 86                | 73               | 74               | 78               |
| 9a                                       |                | 14/12/78 | 26800              | 64            | 18000        | 13.0          | 130                | 0.27       | 0.0095 | 93                | 71               | 73               | 78               |
| 9b                                       |                | 20/12/78 | 26800              | 64            | 18000        | 9.0           | 220                | 0.27       | 0.0445 | 87                | 58               | 59               | 61               |
| 10                                       | Sinnamary      | 12/11/93 | 1120               | 39            | 2700         | 8.6           | 168                | 0.46       | 0.2923 | 10                | 11               | 11               | 11               |
| 10a                                      |                | 27/04/94 | 1120               | 39            | 2700         | 9.6           | 148                | 0.46       | 0.2090 | 12                | 12               | 12               | 13               |
| 10b                                      |                | 02/11/94 | 1120               | 39            | 2700         | 7.8           | 112                | 0.46       | 0.6594 | 17                | 14               | 15               | 14               |
| 10c                                      |                | 03/11/94 | 1120               | 39            | 2700         | 9.5           | 112                | 0.46       | 0.2689 | 14                | 14               | 15               | 15               |
| 11                                       | MaeKlong       | 08/03/77 | 1100               | 150           | 3200         | 10.0          | 60                 | 0.48       | 0.3871 | 32                | 25               | 26               | 25               |
| 11a                                      |                | 09/04/77 | 1100               | 150           | 3200         | 9.0           | 36                 | 0.48       | 0.3335 | 47                | 28               | 29               | 29               |
| 12                                       | Lalang         | 20/10/89 | 2880               | 167           | 0            | 29.0          | 120                | 0.57       | 0.0677 | 34                | 44               | 36               | 29               |
| 13                                       | Limpopo        | 04/04/80 | 1140               | 115           | 20000        | 7.0           | 150                | 0.38       | 0.1406 | 27                | 26               | 26               | 26               |
| 13a                                      |                | 31/12/82 | 1140               | 115           | 20000        | 8.0           | 2                  | 0.38       | 0.0264 | 72                | 99               | 99               | 103              |
| 13b                                      |                | 14/07/94 | 1140               | 115           | 20000        | 7.0           | 5                  | 0.38       | 0.0665 | 53                | 68               | 68               | 69               |
| 13c                                      |                | 24/07/94 | 1140               | 115           | 20000        | 6.8           | 5                  | 0.38       | 0.0881 | 58                | 72               | 72               | 72               |
| 13d                                      |                | 10/08/94 | 1140               | 115           | 20000        | 7.1           | 3                  | 0.38       | 0.0515 | 65                | 85               | 85               | 86               |
| 14                                       | Tha Chin (New) | 16/04/81 | 1440               | 87            | 5000         | 12.0          | 55                 | 0.31       | 1.2382 | 72                | 54               | 52               | 44               |
| 14a                                      |                | 27/02/86 | 1440               | 87            | 5000         | 20.0          | 40                 | 0.31       | 0.0316 | 51                | 53               | 51               | 51               |
| 14b                                      |                | 01/03/86 | 1440               | 87            | 5000         | 14.0          | 40                 | 0.31       | 0.7125 | 57                | 66               | 64               | 56               |
| 14c                                      |                | 13/08/87 | 1440               | 87            | 5000         | 15.0          | 39                 | 0.31       | 0.0559 | 46                | 44               | 43               | 41               |
| 15                                       | ChaoPhya       | 05/06/62 | 3100               | 130           | 12000        | 22.0          | 63                 | 0.71       | 0.0963 | 50                | 54               | 50               | 44               |
| 15a                                      |                | 16/01/87 | 3100               | 130           | 12000        | 14.0          | 180                | 0.71       | 0.2913 | 26                | 28               | 27               | 25               |
| 15b                                      |                | 23/02/83 | 3100               | 130           | 12000        | 19.0          | 100                | 0.71       | 0.1981 | 43                | 44               | 41               | 36               |
| 15c                                      |                | 29/01/83 | 3100               | 130           | 12000        | 26.0          | 90                 | 0.71       | 0.0894 | 52                | 54               | 50               | 45               |
| 16                                       | Edisto         | 12/07/10 | 5150               | 15            | 2000         | 10.0          | 15                 | 0.31       | 0.0366 | 43                | 41               | 44               | 48               |
| 16a                                      |                | 13/07/10 | 5150               | 15            | 2000         | 10.0          | 14                 | 0.31       | 0.0312 | 45                | 41               | 43               | 48               |
| 16b                                      |                | 14/07/10 | 5150               | 15            | 2000         | 10.0          | 25                 | 0.31       | 0.0580 | 44                | 38               | 40               | 44               |
| 16c                                      |                | 15/07/10 | 5150               | 15            | 2000         | 10.0          | 25                 | 0.31       | 0.0579 | 43                | 38               | 40               | 44               |
| 17                                       | Elbe_Flanders  | 21/09/04 | 27300              | 70            | 33000        | 18.0          | 200                | 0.27       | 0.0064 | 92                | 98               | 102              | 115              |
| 17a                                      | Elbe_Kuijper   | 21/09/04 | 46000              | 66            | 0            | 18.0          | 200                | 0.25       | 0.0125 | 93                | 101              | 106              | 118              |
| 17b                                      | Elbe_Savenije  | 21/09/04 | 43000              | 66            | 0            | 18.0          | 200                | 0.28       | 0.0122 | 94                | 91               | 95               | 107              |
| 18                                       | Pangani        | 27/10/07 | 860                | 15            | 3100         | 17.0          | 15                 | 0.41       | 0.0181 | 29                | 30               | 30               | 32               |
| 18a                                      |                | 11/12/07 | 860                | 15            | 3100         | 15.0          | 11                 | 0.41       | 0.0189 | 25                | 30               | 30               | 32               |
| 19                                       | Rembau Linggi  | 05/07/12 | 1500               | 8             | 500          | 8.7           | 26                 | 0.36       | 0.2123 | 20                | 19               | 20               | 22               |
| 20                                       | Landak         | 15/09/09 | 2000               | 60            | 0            | 15.0          | 10                 | 0.69       | 0.0522 | 36                | 44               | 43               | 42               |

**(b) Less Reliable Sets for Verification**

| No  | Estuary          | Date     | A <sub>1</sub><br>(m <sup>2</sup> ) | a <sub>2</sub><br>(km) | x <sub>1</sub><br>(m) | E <sub>0</sub><br>(km) | Q<br>(m <sup>3</sup> /s) | K<br>Pre | N <sub>r</sub> | L <sup>HWS</sup><br>(km) | L <sup>HWS</sup><br>[2] | L <sup>HWS</sup><br>[4] | L <sup>HWS</sup><br>[9] |
|-----|------------------|----------|-------------------------------------|------------------------|-----------------------|------------------------|--------------------------|----------|----------------|--------------------------|-------------------------|-------------------------|-------------------------|
| 21  | Delaware         | 23/08/32 | 255000                              | 41                     | 0                     | 8.0                    | 120                      | 0.09     | 0.0120         | 147                      | 136                     | 132                     | 131                     |
| 21a |                  | 04/10/32 | 255000                              | 41                     | 0                     | 8.0                    | 72                       | 0.09     | 0.0072         | 160                      | 145                     | 141                     | 141                     |
| 22  | Westerschelde    | 01/07/87 | 150000                              | 27                     | 0                     | 10.0                   | 90                       | 0.10     | 0.0107         | 120                      | 104                     | 102                     | 104                     |
| 22a |                  | 02/11/00 | 150000                              | 27                     | 0                     | 12.0                   | 220                      | 0.10     | 0.0159         | 124                      | 97                      | 96                      | 96                      |
| 23  | Pungue           | 26/05/82 | 14500                               | 19                     | 0                     | 9.0                    | 50                       | 0.22     | 0.0242         | 59                       | 40                      | 43                      | 48                      |
| 23a |                  | 06/08/82 | 14500                               | 19                     | 0                     | 10.0                   | 36                       | 0.22     | 0.0138         | 65                       | 43                      | 47                      | 53                      |
| 23b |                  | 22/09/82 | 14500                               | 19                     | 0                     | 15.0                   | 26                       | 0.22     | 0.0030         | 73                       | 50                      | 54                      | 62                      |
| 23c |                  | 29/10/82 | 14500                               | 19                     | 0                     | 15.0                   | 60                       | 0.22     | 0.0067         | 63                       | 44                      | 47                      | 55                      |
| 23d |                  | 31/01/02 | 14500                               | 19                     | 0                     | 19.0                   | 262                      | 0.22     | 0.0100         | 50                       | 35                      | 37                      | 44                      |
| 23e |                  | 27/02/02 | 14500                               | 19                     | 0                     | 21.0                   | 200                      | 0.22     | 0.0059         | 47                       | 38                      | 41                      | 48                      |
| 23f |                  | 01/03/02 | 14500                               | 19                     | 0                     | 27.0                   | 150                      | 0.22     | 0.0020         | 56                       | 43                      | 47                      | 55                      |
| 23g |                  | 26/09/80 | 14500                               | 19                     | 0                     | 17.0                   | 22                       | 0.22     | 0.0017         | 82                       | 53                      | 56                      | 65                      |
| 23h |                  | 03/10/93 | 14500                               | 19                     | 0                     | 11.0                   | 10                       | 0.22     | 0.0031         | 86                       | 54                      | 58                      | 66                      |
| 23i |                  | 12/10/93 | 14500                               | 19                     | 0                     | 15.0                   | 10                       | 0.22     | 0.0012         | 86                       | 58                      | 61                      | 71                      |
| 23j |                  | 16/10/93 | 14500                               | 19                     | 0                     | 16.0                   | 10                       | 0.22     | 0.0010         | 98                       | 58                      | 62                      | 72                      |
| 24  | Incomati         | 05/09/82 | 1070                                | 40                     | 15000                 | 7.0                    | 2                        | 0.34     | 0.0528         | 67                       | 57                      | 56                      | 54                      |
| 24a |                  | 23/06/93 | 1070                                | 40                     | 15000                 | 8.0                    | 4                        | 0.34     | 0.0506         | 53                       | 47                      | 46                      | 45                      |
| 24b |                  | 07/07/93 | 1070                                | 40                     | 15000                 | 9.0                    | 4                        | 0.34     | 0.0326         | 57                       | 48                      | 47                      | 46                      |
| 25  | Solo             | 26/07/88 | 2070                                | 226                    | 0                     | 9.0                    | 50                       | 0.64     | 3.6975         | 29                       | 47                      | 51                      | 48                      |
| 25a |                  | 08/09/88 | 2070                                | 226                    | 0                     | 5.0                    | 7                        | 0.64     | 3.5219         | 39                       | 86                      | 93                      | 88                      |
| 26  | Eems             | -        | 120000                              | 19                     | 0                     | 15.0                   | 10                       | 0.11     | 0.0002         | 83                       | 91                      | 94                      | 106                     |
| 27  | Tejo             | 18/08/81 | 100000                              | 13                     | 0                     | 10.0                   | 29                       | 0.16     | 0.0032         | 60                       | 56                      | 55                      | 56                      |
| 27a |                  | 21/10/81 | 100000                              | 13                     | 0                     | 6.0                    | 149                      | 0.16     | 0.0771         | 50                       | 44                      | 43                      | 41                      |
| 28  | Elbe_Flanders    | 09/07/02 | 27300                               | 70                     | 33000                 | 10.0                   | 100                      | 0.27     | 0.0018         | 49                       | 60                      | 62                      | 71                      |
| 28a |                  | 04/04/04 | 27300                               | 70                     | 33000                 | 22.0                   | 211                      | 0.27     | 0.0004         | 57                       | 65                      | 67                      | 78                      |
| 28b |                  | 01/11/04 | 27300                               | 70                     | 33000                 | 10.0                   | 100                      | 0.27     | 0.0022         | 58                       | 62                      | 64                      | 73                      |
| 29a | Elbe_Kuijper     | 09/07/02 | 46000                               | 66                     | 0                     | 10.0                   | 100                      | 0.25     | 0.0154         | 52                       | 80                      | 84                      | 95                      |
| 29b |                  | 04/04/04 | 46000                               | 66                     | 0                     | 21.0                   | 211                      | 0.25     | 0.0046         | 68                       | 87                      | 92                      | 107                     |
| 29c |                  | 01/11/04 | 46000                               | 66                     | 0                     | 10.0                   | 100                      | 0.25     | 0.0134         | 63                       | 76                      | 81                      | 92                      |
| 30a | Elbe_Savenije    | 09/07/02 | 43000                               | 66                     | 0                     | 10.0                   | 100                      | 0.28     | 0.0151         | 52                       | 71                      | 75                      | 85                      |
| 30b |                  | 04/04/04 | 43000                               | 66                     | 0                     | 21.0                   | 211                      | 0.28     | 0.0046         | 67                       | 79                      | 83                      | 96                      |
| 30c |                  | 01/11/04 | 43000                               | 66                     | 0                     | 10.0                   | 100                      | 0.28     | 0.0131         | 61                       | 68                      | 72                      | 81                      |
| 31a | Rompin           | 10/07/98 | 840                                 | 110                    | 19000                 | 8.7                    | 20                       | 0.64     | 0.4240         | 43                       | 30                      | 34                      | 40                      |
| 31b |                  | 11/07/98 | 840                                 | 110                    | 19000                 | 8.7                    | 20                       | 0.64     | 0.3722         | 42                       | 30                      | 33                      | 39                      |
| 31c |                  | 12/07/98 | 840                                 | 110                    | 19000                 | 8.7                    | 20                       | 0.64     | 0.3515         | 41                       | 29                      | 33                      | 39                      |
| 32a | Ulu Sedili Besar | 24/06/98 | 670                                 | 38                     | 4300                  | 11.0                   | 8                        | 0.45     | 0.0600         | 28                       | 32                      | 35                      | 40                      |
| 32b |                  | 25/06/98 | 670                                 | 38                     | 4300                  | 11.0                   | 8                        | 0.45     | 0.0606         | 29                       | 32                      | 35                      | 40                      |
| 32c |                  | 26/06/98 | 670                                 | 38                     | 4300                  | 11.0                   | 8                        | 0.45     | 0.0668         | 32                       | 33                      | 36                      | 42                      |

**Table S4.** Results from the regression analyses for the predictive equation of Van der Burgh's coefficient  $K$ .

| <b>Van der Burg's Coefficient K Regression</b> |                      |           |
|------------------------------------------------|----------------------|-----------|
| <b>K</b>                                       | <b>R<sup>2</sup></b> | <b>SE</b> |
|                                                | 0.72                 | 0.11      |
| <i>Dimensionless ratio</i>                     | <i>Exponent</i>      | <i>SE</i> |
| Intercept                                      | -5.10                | 1.97      |
| $B_r/B_1$                                      | 0.30                 | 0.12      |
| $g/C^2$                                        | 0.09                 | 0.10      |
| $E_1/H_1$                                      | 0.97                 | 0.31      |
| $h_1/b_2$                                      | 0.11                 | 0.12      |
| $H_1/h_1$                                      | 1.10                 | 0.36      |
| $\lambda_1/E_1$                                | 1.68                 | 0.79      |

**Table S5.** Results from the regression analysis for the predictive equation of dispersion coefficient  $D$ .

| <b>Dispersion Coefficient <math>D_1^{TA}</math> Regression (1/2)</b> |                      |           |                                |                      |           |
|----------------------------------------------------------------------|----------------------|-----------|--------------------------------|----------------------|-----------|
| <b>Eqn. R1</b>                                                       | <b>R<sup>2</sup></b> | <b>SE</b> | <b>Eqn. R2</b>                 | <b>R<sup>2</sup></b> | <b>SE</b> |
|                                                                      | 0.67                 | 0.33      |                                | 0.84                 | 0.14      |
| <i>Dimensionless ratio</i>                                           | <i>Exponent</i>      | <i>SE</i> | <i>Dimensionless ratio</i>     | <i>Exponent</i>      | <i>SE</i> |
| Coefficient                                                          | 3.33                 | 0.11      | Coefficient                    | -0.93                | 0.05      |
| Nr <sub>1</sub>                                                      | 0.84                 | 0.09      | Nr <sub>1</sub>                | 0.57                 | 0.04      |
| <b>Eqn. R3</b>                                                       | <b>R<sup>2</sup></b> | <b>SE</b> | <b>Eqn. R4</b>                 | <b>R<sup>2</sup></b> | <b>SE</b> |
|                                                                      | 0.84                 | 0.14      |                                | 0.86                 | 0.13      |
| <i>Dimensionless ratio</i>                                           | <i>Exponent</i>      | <i>SE</i> | <i>Dimensionless ratio</i>     | <i>Exponent</i>      | <i>SE</i> |
| Coefficient                                                          | -0.82                | 0.30      | Coefficient                    | -0.40                | 0.21      |
| Nr <sub>1</sub>                                                      | 0.58                 | 0.04      | Nr <sub>1</sub>                | 0.57                 | 0.04      |
| h <sub>1</sub> /a <sub>2</sub>                                       | 0.03                 | 0.07      | g/C <sup>2</sup>               | 0.21                 | 0.08      |
| <b>Eqn. R5</b>                                                       | <b>R<sup>2</sup></b> | <b>SE</b> | <b>Eqn. R6</b>                 | <b>R<sup>2</sup></b> | <b>SE</b> |
|                                                                      | 0.84                 | 0.14      |                                | 0.84                 | 0.14      |
| <i>Dimensionless ratio</i>                                           | <i>Exponent</i>      | <i>SE</i> | <i>Dimensionless ratio</i>     | <i>Exponent</i>      | <i>SE</i> |
| Coefficient                                                          | -0.55                | 0.51      | Coefficient                    | -0.87                | 0.40      |
| Nr <sub>1</sub>                                                      | 0.57                 | 0.04      | Nr <sub>1</sub>                | 0.57                 | 0.04      |
| H <sub>1</sub> /E <sub>1</sub>                                       | 0.10                 | 0.14      | h <sub>1</sub> /E <sub>1</sub> | 0.02                 | 0.12      |
| <b>Eqn. R7</b>                                                       | <b>R<sup>2</sup></b> | <b>SE</b> | <b>Eqn. R8</b>                 | <b>R<sup>2</sup></b> | <b>SE</b> |
|                                                                      | 0.84                 | 0.14      |                                | 0.84                 | 0.14      |
| <i>Dimensionless ratio</i>                                           | <i>Exponent</i>      | <i>SE</i> | <i>Dimensionless ratio</i>     | <i>Exponent</i>      | <i>SE</i> |
| Coefficient                                                          | -0.91                | 0.26      | Coefficient                    | -0.94                | 0.07      |
| Nr <sub>1</sub>                                                      | 0.58                 | 0.04      | Nr <sub>1</sub>                | 0.58                 | 0.04      |
| λ <sub>1</sub> /E <sub>1</sub>                                       | -0.02                | 0.16      | λ <sub>1</sub> /a <sub>2</sub> | 0.02                 | 0.07      |
| <b>Eqn. R9</b>                                                       | <b>R<sup>2</sup></b> | <b>SE</b> | <b>Eqn. R10</b>                | <b>R<sup>2</sup></b> | <b>SE</b> |
|                                                                      | 0.80                 | 0.15      |                                | 0.86                 | 0.13      |
| <i>Dimensionless ratio</i>                                           | <i>Exponent</i>      | <i>SE</i> | <i>Dimensionless ratio</i>     | <i>Exponent</i>      | <i>SE</i> |
| Coefficient                                                          | 0.29                 | 0.14      | Coefficient                    | -0.53                | 0.31      |
| Nr <sub>1</sub> .g/C <sup>2</sup>                                    | 0.51                 | 0.04      | Nr <sub>1</sub>                | 0.56                 | 0.04      |
|                                                                      |                      |           | h <sub>1</sub> /a <sub>2</sub> | -0.04                | 0.07      |
|                                                                      |                      |           | g/C <sup>2</sup>               | 0.23                 | 0.09      |



**Dispersion Coefficient  $D_1^{TA}$  Regression (2/2)**

| <b>Eqn. R11</b>                                                   |                      |           | <b>Eqn. R12</b>                                                   |                      |           |
|-------------------------------------------------------------------|----------------------|-----------|-------------------------------------------------------------------|----------------------|-----------|
|                                                                   | <b>R<sup>2</sup></b> | <b>SE</b> |                                                                   | <b>R<sup>2</sup></b> | <b>SE</b> |
|                                                                   | 0.86                 | 0.13      |                                                                   | 0.86                 | 0.13      |
| <i>Dimensionless ratio</i>                                        | <i>Exponent</i>      | <i>SE</i> | <i>Dimensionless ratio</i>                                        | <i>Exponent</i>      | <i>SE</i> |
| Coefficient                                                       | -0.63                | 0.48      | Coefficient                                                       | -0.37                | 0.23      |
| Nr <sub>1</sub>                                                   | 0.57                 | 0.04      | Nr <sub>1</sub>                                                   | 0.57                 | 0.04      |
| g/C <sup>2</sup>                                                  | 0.23                 | 0.09      | g/C <sup>2</sup>                                                  | 0.22                 | 0.08      |
| H <sub>1</sub> /E <sub>1</sub>                                    | -0.08                | 0.15      | λ <sub>1</sub> /a <sub>2</sub>                                    | -0.02                | 0.07      |
| <b>Eqn. R13</b>                                                   |                      |           | <b>Eqn. R14</b>                                                   |                      |           |
|                                                                   | 0.86                 | 0.13      |                                                                   | 0.71                 | 0.19      |
| <i>Dimensionless ratio</i>                                        | <i>Exponent</i>      | <i>SE</i> | <i>Dimensionless ratio</i>                                        | <i>Exponent</i>      | <i>SE</i> |
| Coefficient                                                       | -0.41                | 0.31      | Coefficient                                                       | 1.70                 | 0.31      |
| Nr <sub>1</sub>                                                   | 0.57                 | 0.04      | Nr <sub>1</sub> .g/C <sup>2</sup> .H <sub>1</sub> /E <sub>1</sub> | 0.44                 | 0.04      |
| g/C <sup>2</sup>                                                  | 0.21                 | 0.08      |                                                                   |                      |           |
| λ <sub>1</sub> /E <sub>1</sub>                                    | 0.01                 | 0.15      |                                                                   |                      |           |
| <b>Eqn. R15</b>                                                   |                      |           | <b>Eqn. R16</b>                                                   |                      |           |
|                                                                   | 0.80                 | 0.16      |                                                                   | 0.86                 | 0.14      |
| <i>Dimensionless ratio</i>                                        | <i>Exponent</i>      | <i>SE</i> | <i>Dimensionless ratio</i>                                        | <i>Exponent</i>      | <i>SE</i> |
| Coefficient                                                       | -0.57                | 0.08      | Coefficient                                                       | -0.63                | 0.48      |
| Nr <sub>1</sub> .g/C <sup>2</sup> .λ <sub>1</sub> /E <sub>1</sub> | 0.45                 | 0.03      | Nr <sub>1</sub>                                                   | 0.56                 | 0.04      |
|                                                                   |                      |           | h <sub>1</sub> /a <sub>2</sub>                                    | -0.03                | 0.08      |
|                                                                   |                      |           | g/C <sup>2</sup>                                                  | 0.24                 | 0.10      |
|                                                                   |                      |           | H <sub>1</sub> /E <sub>1</sub>                                    | -0.05                | 0.17      |
| <b>Eqn. R17</b>                                                   |                      |           | <b>Eqn. R18</b>                                                   |                      |           |
|                                                                   | 0.03                 | 0.35      |                                                                   | 0.17                 | 0.32      |
| <i>Dimensionless ratio</i>                                        | <i>Exponent</i>      | <i>SE</i> | <i>Dimensionless ratio</i>                                        | <i>Exponent</i>      | <i>SE</i> |
| Coefficient                                                       | -1.29                | 1.23      | Coefficient                                                       | -0.24                | 0.57      |
| g/C <sup>2</sup>                                                  | 0.29                 | 0.24      | g/C <sup>2</sup>                                                  | 0.31                 | 0.20      |
| H <sub>1</sub> /E <sub>1</sub>                                    | -0.12                | 0.38      | B <sub>1</sub> /h <sub>1</sub>                                    | -0.27                | 0.10      |

## Section II (Figure)

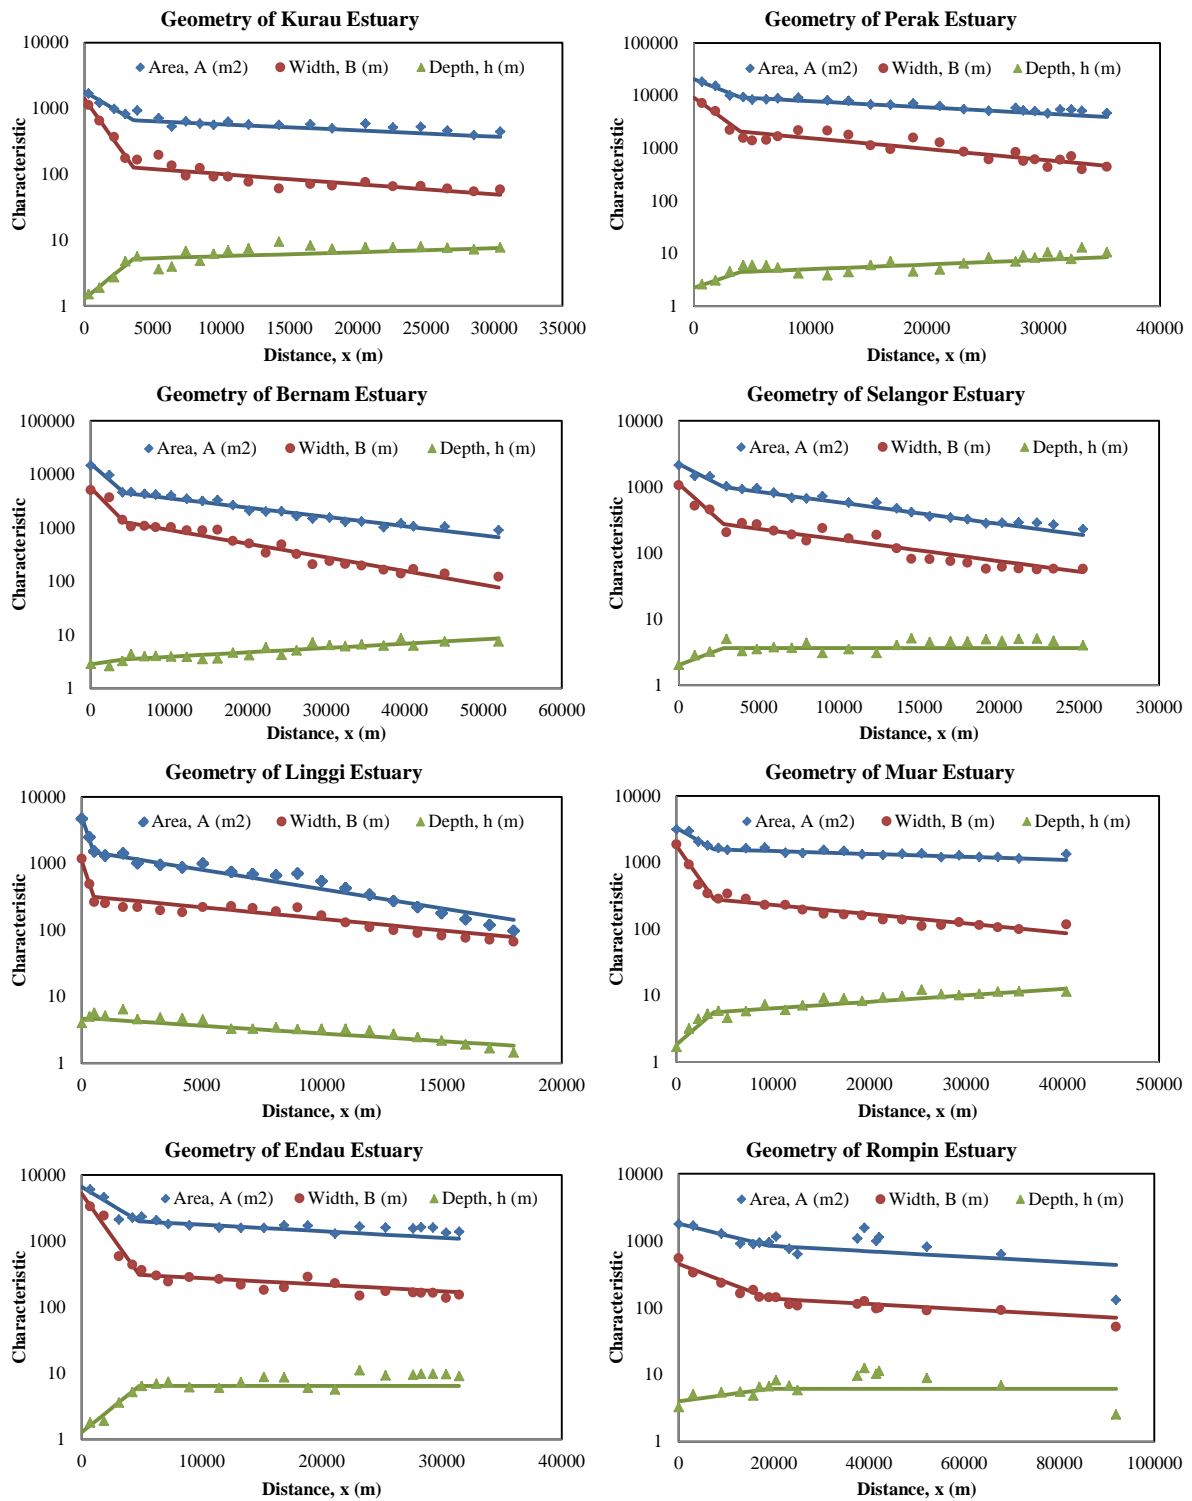

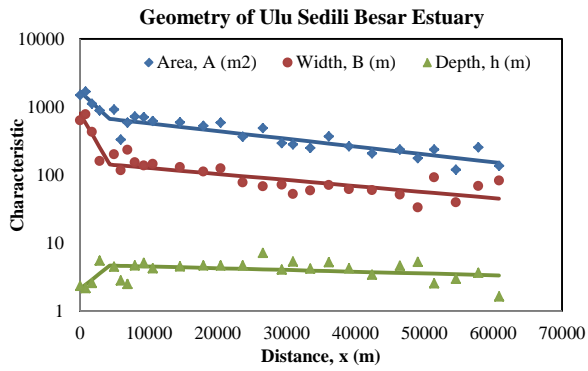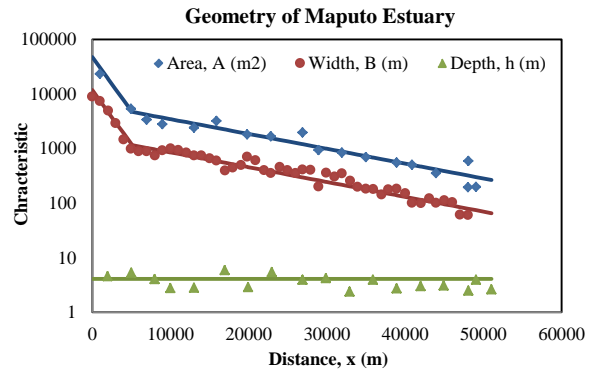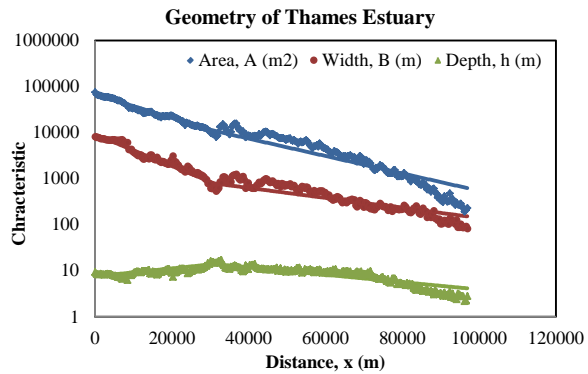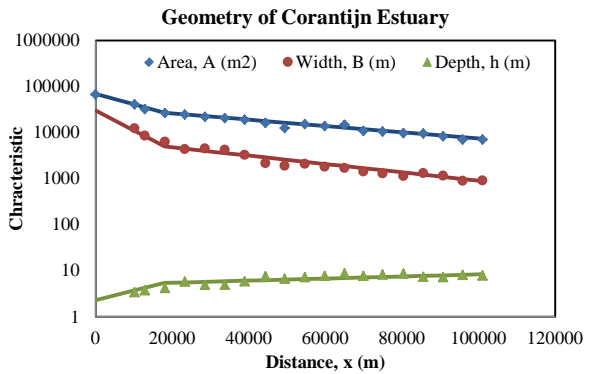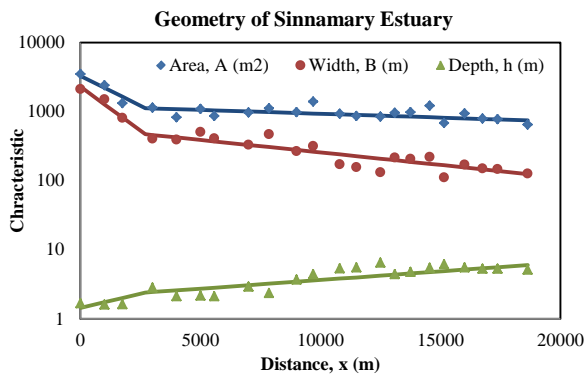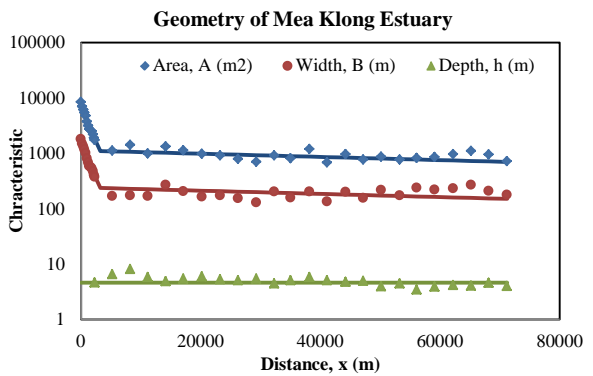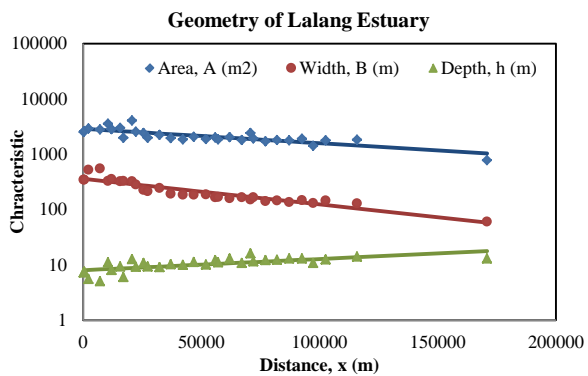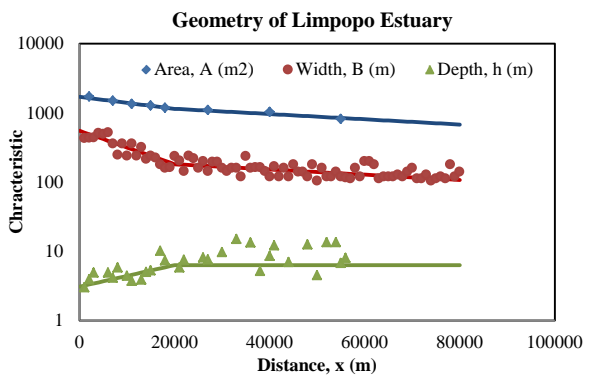

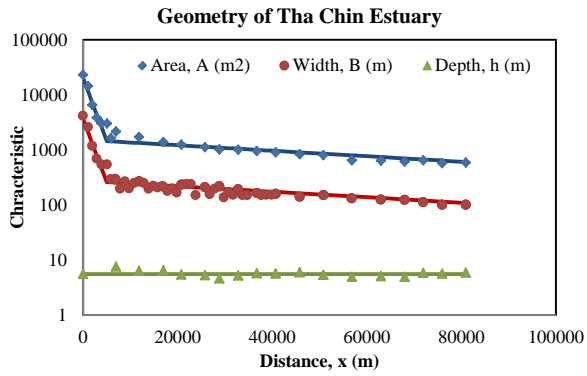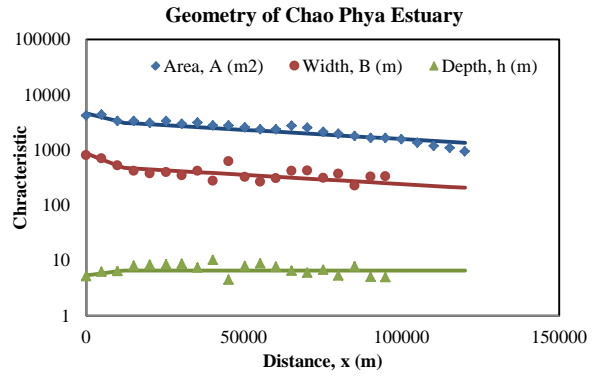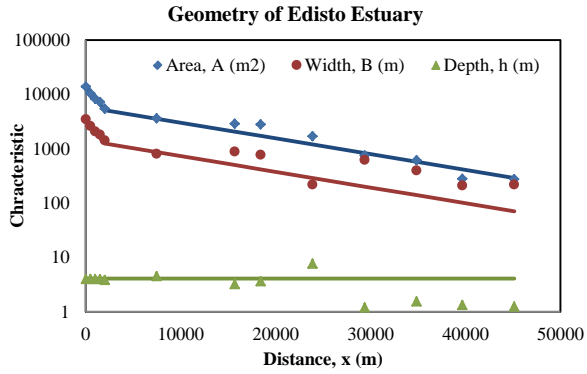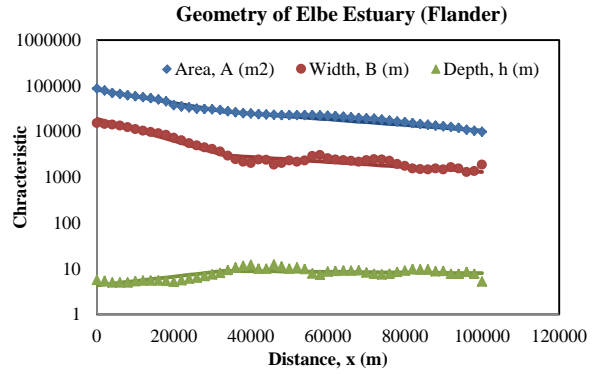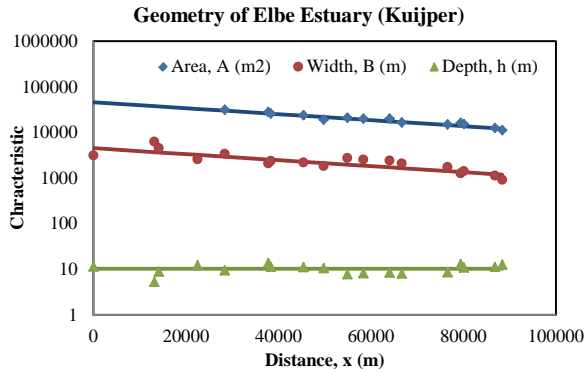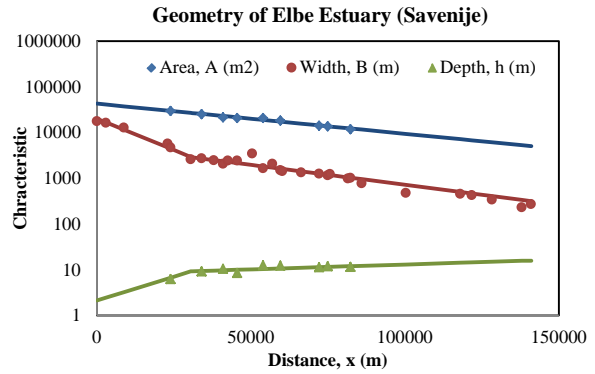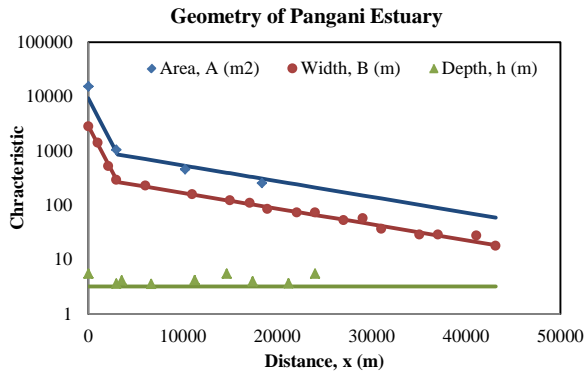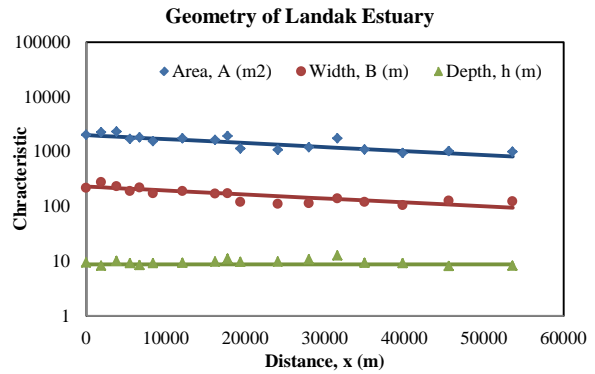

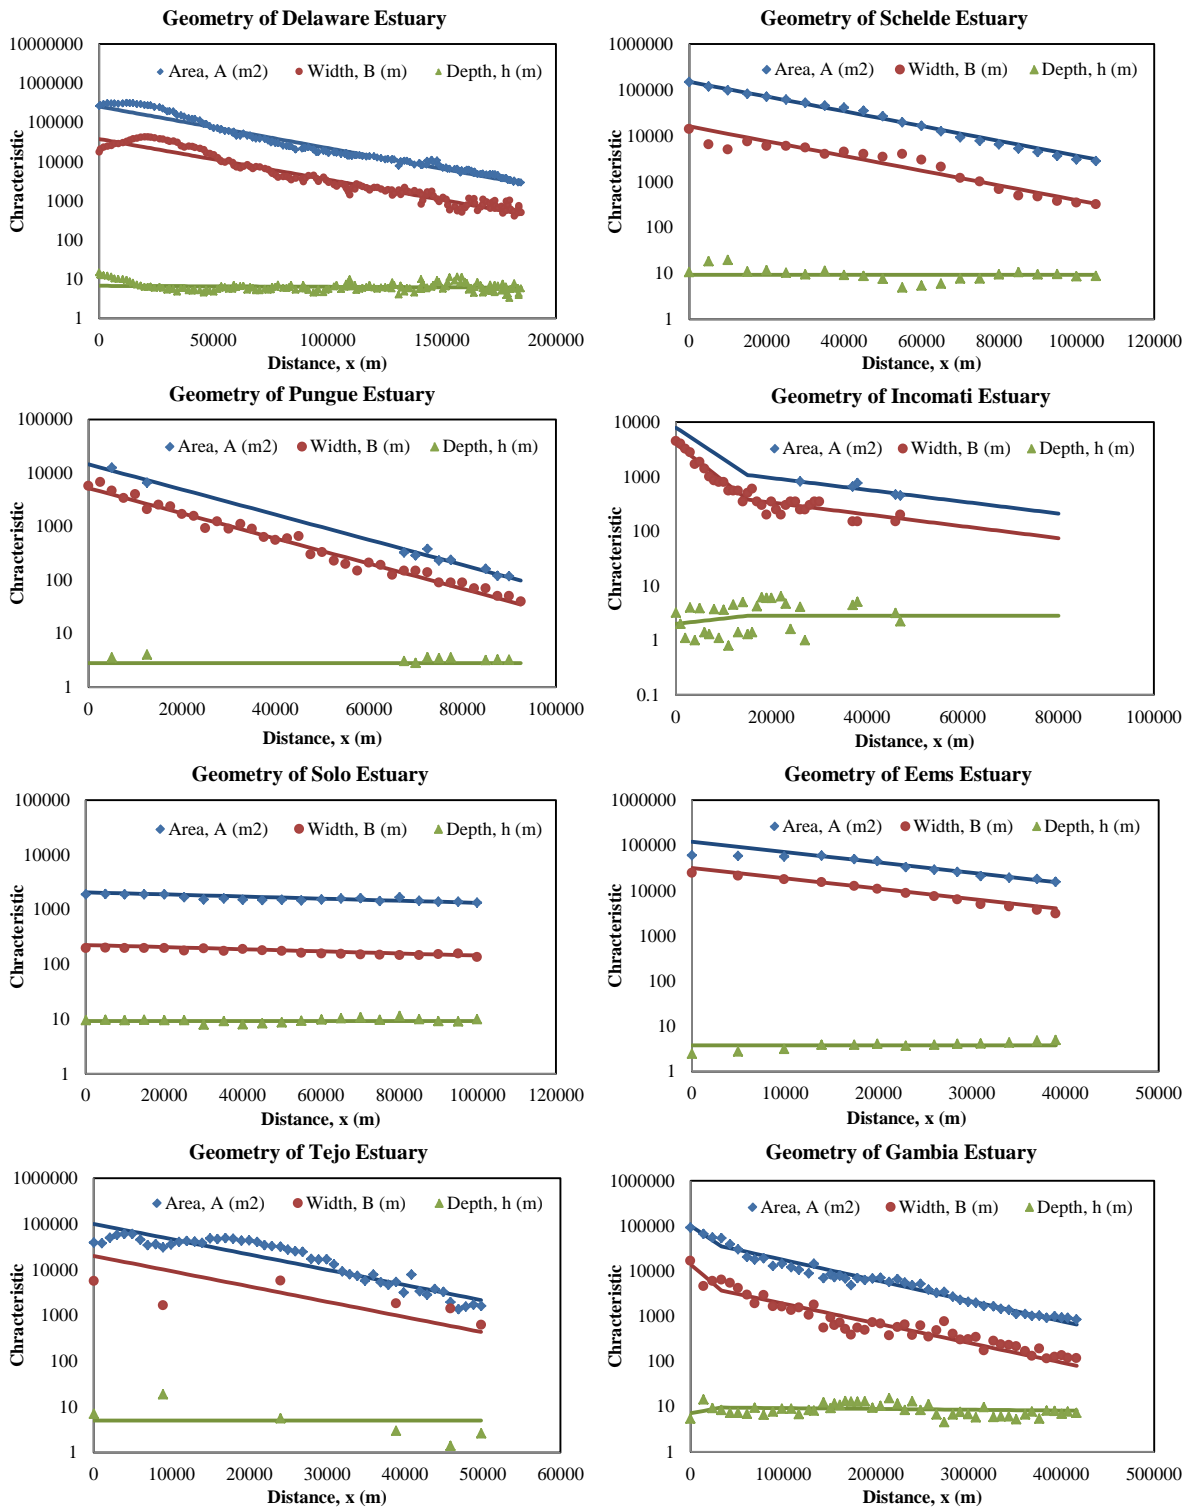

**Figure S1.** Compilation of the geometry analysis for the 7 newly surveyed estuaries and those collected from existing resources (mainly from Savenije (2005, 2012)).

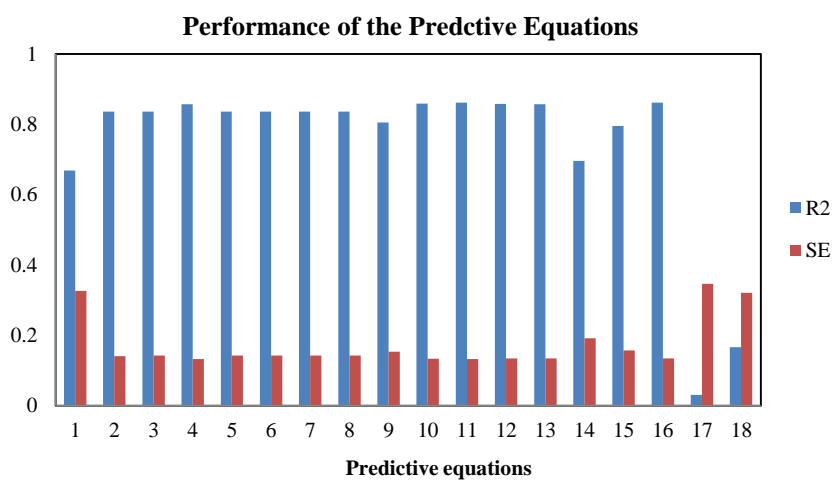

**Figure S2.** Chart showing the correlation coefficient  $R^2$  and standard error  $SE$  for each predictive equation.
